# Supplementary material for: Effect of preoperative chemoradiotherapy on the immunological status of rectal cancer patients
Source: PubMed Central journal article supplement — J Radiat Res. 2020 Jul 16;61(5):766–75. doi: 10.1093/jrr/rraa041 (PMC7482156; doi:10.1093/jrr/rraa041), 2020-07-16
Supplement: supplementary_tables_1_3rraa041.pdf [file supplementary_tables_1_3rraa041.pdf]

## Supplementary Table S1

**Table S1 Gene expression profiling of immune response-associated genes in CRT-treated rectal cancers**

| ProbeName     | Gene Symbol          | p value | Regulation | FC    |
|---------------|----------------------|---------|------------|-------|
| A_23_P71037   | IL6                  | 0.0190  | up         | 11.8  |
| A_24_P250922  | PTGS2                | 0.0239  | up         | 8.2   |
| A_21_P0000178 | TREM1                | 0.0269  | up         | 7.6   |
| A_23_P389897  | NGFR                 | 0.0052  | up         | 7.3   |
| A_33_P3344831 | TMEM45A              | 0.0017  | up         | 6.5   |
| A_33_P3363804 | NCAM1 (CD56)         | 0.0259  | up         | 6.5   |
| A_33_P3214159 | CDH2                 | 0.0225  | up         | 6.0   |
| A_23_P88404   | TGFB3                | 0.0033  | up         | 5.2   |
| A_23_P92499   | TLR2                 | 0.0217  | up         | 4.9   |
| A_33_P3241021 | CD69                 | 0.0401  | up         | 4.6   |
| A_23_P152838  | CCL5                 | 0.0483  | up         | 4.1   |
| A_33_P3410659 | CLEC12B              | 0.0234  | up         | 4.1   |
| A_24_P193093  | KLRK1 (CD314, NKG2D) | 0.0421  | up         | 4.0   |
| A_24_P218979  | CDCA3                | 0.0332  | down       | -5.5  |
| A_23_P120281  | EDAR                 | 0.0382  | down       | -5.5  |
| A_24_P157370  | IL17RB               | 0.0069  | down       | -8.9  |
| A_23_P49155   | CDH3                 | 0.0049  | down       | -12.4 |
| A_23_P206359  | CDH1                 | 0.0042  | down       | -24.9 |

## Supplementary Table S2

**Table S2 Upregulated and downregulated genes after CRT in SCC820 cancer-associated gene panel**

| ProbeName     | GeneSymbol | p value  | Regulation | FC    |
|---------------|------------|----------|------------|-------|
| A_33_P3257027 | FGF7       | 0.00016  | up         | 10.4  |
| A_33_P3246985 | PDE4DIP    | 0.00072  | up         | 7.6   |
| A_33_P3333982 | PDE4DIP    | 0.00192  | up         | 7.0   |
| A_24_P410610  | DPYD       | 0.00150  | up         | 5.3   |
| A_33_P3276713 | HGF        | 0.00030  | up         | 4.6   |
| A_33_P3332362 | POU2F2     | 0.00180  | up         | 4.5   |
| A_23_P500861  | SYNE1      | 0.00139  | up         | 4.2   |
| A_23_P71624   | PAX5       | 0.00026  | up         | 4.0   |
| A_23_P24031   | TLX1       | 0.00206  | down       | -4.5  |
| A_33_P3385775 | (ZFP 703)  | 0.00017  | down       | -5.1  |
| A_23_P148015  | AXIN2      | 0.00032  | down       | -7.2  |
| A_24_P416346  | ETV4       | 0.00175  | down       | -9.2  |
| A_23_P215956  | MYC        | 2.72E-07 | down       | -16.6 |
| A_32_P164246  | FOXQ1      | 0.00035  | down       | -26.9 |
| A_32_P8221    | GRM8       | 0.00328  | down       | -27.6 |

## Supplementary Table S3

### Comparison of TIL numbers inside the tumor nest between CRT-treated and not-treated rectal cancers

|                         |        |               |               |                  | No.1-8 CRT (+)  |
|-------------------------|--------|---------------|---------------|------------------|-----------------|
|                         |        |               |               |                  | No.9-16 CRT (-) |
| Case No.                | PD-L1  | CD4 (n/5 HPF) | CD8 (n/5 HPF) | FOX-P3 (n/5 HPF) | CD204 (n/5 HPF) |
| 1                       | 0      | 31            | 77            | 8                | 20              |
| 2                       | 0      | 2             | 73            | 15               | 14              |
| 3                       | 0      | 88            | 237           | 48               | 57              |
| 4                       | 1      | 14            | 72            | 2                | 29              |
| 5                       | 5      | 0             | 57            | 13               | 25              |
| 6                       | 0      | 1             | 124           | 0                | 27              |
| 7                       | 0      | 14            | 208           | 25               | 34              |
| 8                       | 20     | 7             | 11            | 7                | 34              |
| 9                       | 0      | 24            | 218           | 19               | 20              |
| 10                      | 0      | 42            | 199           | 7                | 21              |
| 11                      | 0      | 8             | 299           | 2                | 12              |
| 12                      | 10     | 14            | 71            | 4                | 20              |
| 13                      | 0      | 191           | 15            | 0                | 11              |
| 14                      | 0      | 71            | 54            | 2                | 11              |
| 15                      | 5      | 1             | 0             | 6                | 8               |
| 16                      | 10     | 28            | 24            | 25               | 6               |
| <i>P</i> value (t-test) | 0.9668 | 0.5446        | 0.9575        | 0.2511           | 0.0058*         |
| mean (CRT+)             | 3.3    | 19.6          | 107.4         | 14.7             | 30.0            |
| SD (CRT+)               | 6.5    | 27.5          | 72.8          | 14.6             | 12.1            |
| mean (CRT-)             | 3.1    | 47.4          | 110.0         | 8.1              | 13.7            |
| SD (CRT-)               | 4.3    | 58.0          | 105.2         | 8.4              | 5.4             |

Five areas of tumor at a high magnification (x200) in each section stained with various antibodies were used for TIL counting. TIL numbers per area were compared between CRT-treated and non-treated rectal cancers. \* :  $P < 0.01$ . SD; standard deviation. FFPE specimen was not available in REC-009 case.
